# Supplementary material
Source: Springer Nature journal article supplement (https://www.springermedizin.de/resource/supplementary/13023_2010_277_MOESM2_ESM.pdf/9642006)
Supplement: MOESM2 [file 9642006]

| Author, Year [reference] Source         | Sex (years) Genotype (AAT serum in mg/dL) | Clinical data                                                                                                                                           | Effect of augmentation therapy                                                                                                                                                                                                                                                                                          |
|-----------------------------------------|-------------------------------------------|---------------------------------------------------------------------------------------------------------------------------------------------------------|-------------------------------------------------------------------------------------------------------------------------------------------------------------------------------------------------------------------------------------------------------------------------------------------------------------------------|
| Smith et al, 1987 [62] Rochester, US    | Case 1.<br>F (65).<br>ZZ (40)             | Extensive ulcerative relapsing panniculitis requiring hospitalization                                                                                   | After the failure of Indomethacin, Prednisone, Azathioprine, Ketoconazole and Dapsone, a single infusion of AAT (60 mg/Kg/week) was applied in 2 severe recurrences, with significant clinical efficacy.                                                                                                                |
| Smith et al, 1987 [62] Rochester, US    | Case 2.<br>F (36).<br>ZZ (20)             | Extensive ulcerative relapsing panniculitis requiring hospitalization                                                                                   | After the failure of Prednisone and Dapsone, 7 weekly infusions of AAT were successfully applied together with Dapsone and Prednisone.                                                                                                                                                                                  |
| Furey et al. 1996 [63] Chicago, US.     | Case 3.<br>F (62).<br>ZZ. (24)            | Extensive ulcerative relapsing panniculitis with massive edema (in legs, thighs and abdomen) requiring hospitalization                                  | A single infusion of AAT (60 mg/ Kg) was provided. The response was dramatic. Within 24 hours, the patient could walk; and after 3 weekly infusions, both massive edema and panniculitis were resolved.                                                                                                                 |
| O'Riordan et al, 1997 [64] Chicago, US  | Case 4.<br>F (62).<br>ZZ (23)             | Severe ulcerative relapsing panniculitis                                                                                                                | Panniculitis was completely resolved with 3 weekly doses of IV AAT (60/mg/Kg). Skin lesions recurred 6 months later but were resolved with 2 additional infusions, once levels of AAT were over 50 mg/dL.                                                                                                               |
| Chowdhury et al 2002 [65] Cardiff, UK.  | Case 5.<br>F (33).<br>ZZ (46)             | Rapidly progressive panniculitis, septic shock and multiple life-threatening complications                                                              | Augmentation therapy was life-saving. Prolastin® quickly reduced inflammation within 24 hours. Since then, the patient has been feeling well, inflammation-free, under a treatment of 6 g/ week of Prolastin®.                                                                                                          |
| Kjus T et al, 2003 [66]. Oslo, Norway   | Case 6.<br>F (21).<br>ZZ (30)             | Ulcerated chronic relapsing panniculitis.                                                                                                               | After the failure of dapsone and doxycycline, the patient was successfully treated with i.v. infusions of Prolastin® (60/mg/Kg) once a week. “All lessons resolved within 2 days; reappeared after 4 weeks, and again disappeared 1-2 days after Prolastin®. At present, well controlled with infusions every 4th week” |
| Gross B [67]. 2009. Frankfurt, Germany. | Case 7.<br>F (31).<br>ZZ (22)             | Ulcerated relapsing panniculitis.<br><i>Z-type AAT polymers were found in skin, supporting the hypothesis of the pro-inflammatory role of polymers.</i> | The long-term use of intravenous AAT augmentation therapy (Prolastin®) during 3 years reduced both the frequency and severity of panniculitis.                                                                                                                                                                          |
